# Supplementary material for: A macroscale mixture theory analysis of deposition and sublimation rates during heat and mass transfer in dry snow
Source: Copernicus journal article supplement (doi:10.5194/tc-9-1857-2015), 2015-09-23
Supplement: Supplementary file 1 [file tc-9-1857-2015-supplement.zip]

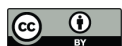

## *Supplement of*

# **A macroscale mixture theory analysis of deposition and sublimation rates during heat and mass transfer in dry snow**

**A. C. Hansen and W. E. Foslien**

*Correspondence to:* A. C. Hansen (hansen@uwyo.edu)

- tc-9-1857-2015-supplement-title-page.pdf
- Cryosphere\_submission
  - diffusion\_tc.m
  - snowpack\_props\_tc.m
  - tgm\_main\_fea\_case1\_tc.m

The copyright of individual parts of the supplement might differ from the CC-BY 3.0 licence.
